# Supplementary material
Source: publisher site journal article supplement (https://www.dovepress.com/article/376607)
Supplement: Supplementary file 1 [file get_supplementary_file.php]

**Supplementary Table 1:** RFS for the patients grouped by TMS.

| <b>Variable</b> | <b>Cut-off value</b> | <b>Case</b> | <b>Media of RFS</b> | <b>1-year RFS</b> | <b>3-year RFS</b> | <b>5-year RFS</b> |
|-----------------|----------------------|-------------|---------------------|-------------------|-------------------|-------------------|
| TMS             | 0                    | 142         | 89%                 | 94.4%             | 79.9%             | 68.0%             |
|                 | 1                    | 171         | 52%                 | 93.0%             | 60.1%             | 45.5%             |
|                 | 2                    | 96          | 23%                 | 68.8%             | 36.0%             | 19.0%             |

**Abbreviations:** TMS, tumor marker score; RFS, recurrence-free survival.

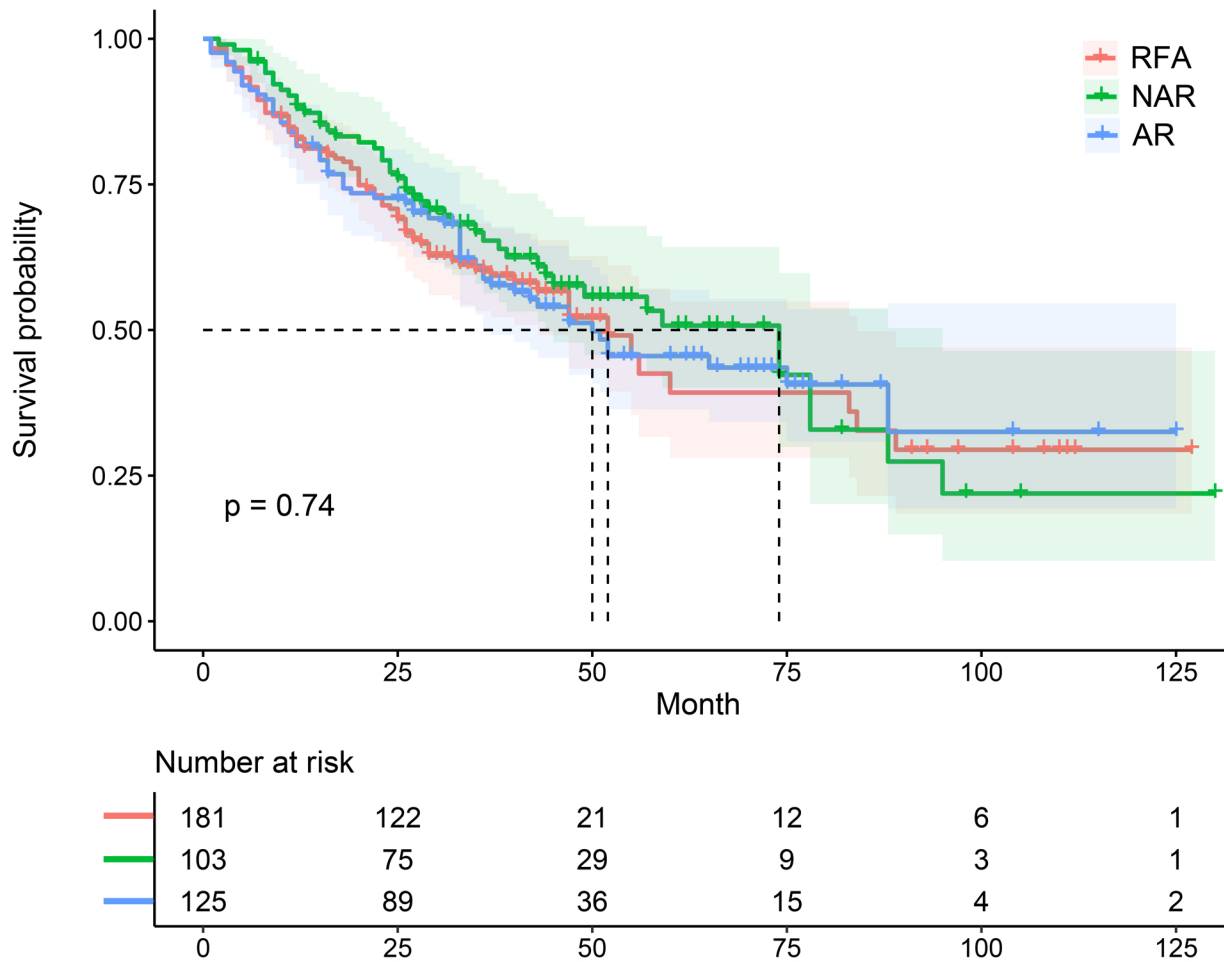

**Supplementary Figure 1: K–M curves of the recurrence-free survival of surgery type.**

**Abbreviations: RFA, radio frequency ablation; NAR, none-anatomical resection; AR, anatomical resection.**
